# Supplementary material for: Understanding the Pathway Switch of the Oxygen Reduction Reaction from Single- to Double-/Triple-Atom Catalysts: A Dual Channel for Electron Acceptance–Backdonation
Source: PubMed Central journal article supplement — JACS Au. 2023 Oct 21;3(11):3031–44. doi: 10.1021/jacsau.3c00432 (PMC10685438; doi:10.1021/jacsau.3c00432), 2023-10-21
Supplement: au3c00432_si_001.pdf [file au3c00432_si_001.pdf]

# SUPPORTING INFORMATION

## **Understanding the pathways switch of oxygen reduction reaction from single- to double/triple-atom catalysts: dual channel for electron acceptance-backdonation**

Jin Liu<sup>a,#</sup>, Haoxiang Xu<sup>a,#</sup>, Jiqin Zhu<sup>b</sup>, and Daojian Cheng<sup>a,\*</sup>

<sup>a</sup>State Key Laboratory of Organic-Inorganic Composites, Interdisciplinary Research Center for hydrogen energy, Beijing University of Chemical Technology, 100029, Beijing, People's Republic of China

<sup>b</sup>State Key Laboratory of Chemical Resource Engineering, Beijing University of Chemical Technology, 100029, Beijing, People's Republic of China

\*Corresponding authors. [chengdj@mail.buct.edu.cn](mailto:chengdj@mail.buct.edu.cn)

#These authors contribute equally.

## Section 1 Supplementary Method

### S1.1 Gibbs free energy computations

The Gibbs free energy ( $G$ ) of the intermediates was calculated by using the computational hydrogen electrode (CHE) model proposed by Nørskov et al. The chemical potential of the  $H^+/e^-$  pair in aqueous solution is related to that of half of the  $H_2$  gas molecule at standard hydrogen electrode (SHE) conditions.  $H_2$  at standard temperature and pressure and  $H_2O$  at its standard vapor pressure were used as references for H and O, respectively. According to this method, the  $G$  value can be determined as follows:

$$\Delta G = \Delta E - T\Delta S + \Delta E_{ZPE} + \Delta E_{solv}$$

where  $\Delta E$  is the reaction energy directly obtained from DFT calculations, and  $T$  is the temperature ( $T=298.15$  K).  $\Delta E_{ZPE}$  and  $\Delta S$  are the differences between the adsorbed species and the gas phase molecules in zero-point energy and entropy, respectively.  $E_{solv}$  represents the solvation effects that were simulated by using the Poisson-Boltzmann continuum-solvation model in the VASPsol code. We take  $pH=0$  in our calculations for ORR in an acidic electrolyte.

### S1.2 Pre-adsorption phase diagram

In this study, we present and discuss the surface preadsorption phase diagram which allows to analyze the free energy dependence of the various electrochemical intermediates at varying potential:

$$\Delta G = \Delta G_{[U=0, pH=0]} - meU$$

The intermediate with the lowest free energy at a given set of potential determines the stable form of the surface in those conditions. Instead of plotting three-dimensional graphs, one generally first investigates the dependence with the potential fixing  $pH = 0$ . Each intermediate species along the catalytic path for ORR on N-doped graphene is characterized by a straight line with a negative slope which is determined by the number  $m$  of electrons to be transferred (1 for  $m-G(OH^*)$ , 2 for  $m-G(O^*)$ , and 4 for  $m-G(O_2^*)$ ).

In different potential ranges, a different intermediate is found to be the most stable (i.e., the lowest line at a given potential). The resulting surface Pourbaix diagram at T = 298.15 K and U=0.9V shows clearly which is the most stable form as a function of the potential.

### S1.3 Polarization curve simulation.

Following the kinetic model developed by Hansen et al.<sup>1</sup>, we simulated the polarization curve of Fe/Co SAC and Fe-Co DACs/TACs. Here, we highlight the construction of a complete ORR pathway on Fe-Co DACs/TACs, and electrochemical O<sub>2</sub>\* protonation producing O\*+OH\* is identified to be quite thermodynamically and kinetically favorable. The O<sub>2</sub> molecule diffusion adsorption, and electrochemical reduction steps are listed by the following equations:

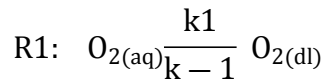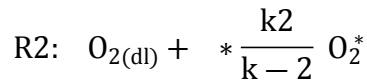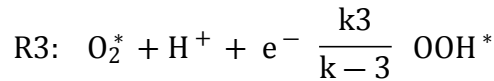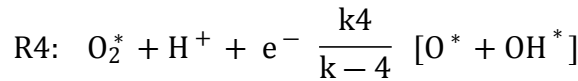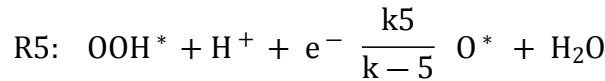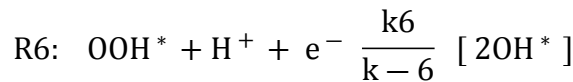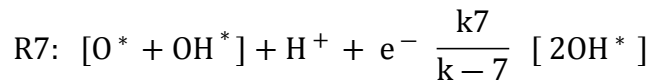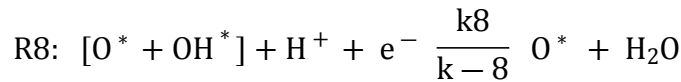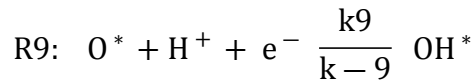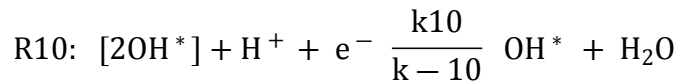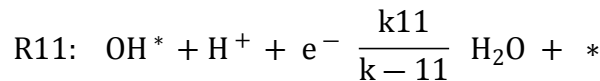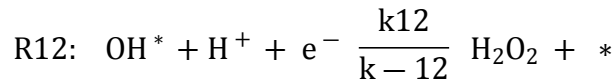

O<sub>2</sub>(aq) and O<sub>2</sub>(dl) represent O<sub>2</sub> in the electrolyte and the catalyst-electrolyte interface,

respectively. Note that equations R<sub>1</sub> and R<sub>2</sub> are non-electrochemical steps, and the rest of equations are electrochemical steps.  $\theta$  represents the coverage of the species. Based on the above reduction steps, we can gained the rate equations of each species, such as,

$$\frac{\partial \chi_{O_2(dl)}}{\partial t} = k_1 \chi_{O_2(aq)} - k_{-1} \chi_{O_2(dl)} - k_2 \chi_{O_2(dl)} \theta^* + k_{-2} \theta_{O_2^*}$$

$$\frac{\partial \theta_{O_2^*}}{\partial t} = k_2 \chi_{O_2(dl)} \theta^* - k_{-2} \theta_{O_2^*} - k_3 \theta_{O_2^*} + k_{-3} \theta_{OOH^*} - k_7 \theta_{O_2^*} - k_{-7} \theta_{[O^* + OH^*]}$$

In these equations  $\chi_{H_2O} = 1$  and  $\chi_{O_2(aq)} = 2.34 \times 10^{-5}$  corresponding to 1 atm O<sub>2</sub>(g) in equilibrium with O<sub>2</sub>(aq). Additionally, site conservation on the Fe/Co SAC site and Fe-Co DACs/TACs sites must be satisfied

$$1 = \theta_{O_2^*} + \theta_{OOH^*} + \theta_{O^*} + \theta_{OH^*} + \theta^* + \theta_{[O^* + OH^*]} + \theta_{[2OH^*]}$$

The rate equations are solved numerically at steady state, and further infer the turn over frequency(TOF).

For non-electronchemical step i, its equilibrium constant (K) can be expressed as:

$$K_i = \exp \left( - \frac{\Delta G_i}{k_B T} \right)$$

where  $\Delta G_i$  is the free energy change of step i, and  $k_B$  is the Boltzmann constant. The rate constant ( $k_i$ ) is given by:

$$k_i = \frac{k_B T}{h} \exp \left( - \frac{E_{a,i}}{k_B T} \right)$$

where  $E_{a,i}$  is the activation energy.

While for electrochemical step,  $K_i$  is associated with the reaction potential (U vs RHE), given by:

$$K_i = \exp \left( - \frac{e(U - U_i)}{k_B T} \right)$$

where  $U_i$  is the reversible potential of step i deduced by  $U_i = -G_i/e$ . And the  $k_i$  is written as:

$$k_i = \frac{k_B T}{h} \exp \left( - \frac{E_{a,i}}{k_B T} \right) \exp \left( - \frac{e\beta_i(U - U_i)}{k_B T} \right)$$

where  $\beta_i$  is the symmetric factor taken as 0.5<sup>2</sup>. Since the  $E_{a,i}$  of electrochemical ORR steps are generally small range from 0.10 to 0.26 eV<sup>2-4</sup>, we adopted  $E_{a,i} = 0.26$  eV for all the electrochemical steps of ORR on Fe/Co SAC and Fe-Co DACs/TACs.

Moreover, the rate constants for all the reverse reaction ( $k_i$ ), can be deduced by:

$$k_{-i} = \frac{k_i}{K_i}$$

Finally, the current density (j) can be calculated by:

$$j = e\rho T O F_e$$

## S1.4 Degree of Rate Control

The degree of rate control (DRC) developed by Campbell was used to quantify the impact of the free energy perturbation  $\delta G_i$  of a specific species i on the total reaction rate, which has been widely adopted to identify the rate-controlling transition states (TS) and intermediates. We slightly modify the original DRC equation to express the impact of the reaction energy changes on the total reaction rate. The  $DRC_r$  is defined as

$$DRC_{r,n} = \left( \frac{\partial \ln r}{\partial \left( -\frac{G_n}{k_B T} \right)} \right)_{G_m \neq n, G_i^{TS}}$$

where  $G_n$  is the reaction energy and  $G_i^{TS}$  is the free energy of a transition state. It describes the sensitivity of the total reaction rate to the reaction energy.

## S1.5 Electronic Structure Analysis

The valance state of Fe-site was investigated by Bader charge analysis (Figure S15). Here, we found that the valence states of Fe are linear correlated to Fe site transferred charge (namely,  $\Delta e$ ) by Bader charge analysis, so that we can draw a linear fit curve based on three standard samples (Fe, FeO and Fe<sub>2</sub>O<sub>3</sub>). After calculating the residual charge (Re) of Fe site in Fe<sub>1</sub>Co<sub>1-1</sub>, Fe<sub>2-1</sub>, Fe<sub>2-2</sub> and Fe<sub>3-1</sub>, we found that their corresponding valence states of Fe site are +2.87, +2.6, +2.59, and +2.63. The  $\Delta e$  is defined as

$$\Delta e = 8 - Re$$

where the valence electron number of an metallic Fe atom is 8 and the residual charge (Re) that is the electric charge of Fe site in the corresponding system.

The crystal orbital Hamilton population (COHP) analysis was further calculated to obtain the bonding and antibonding information of the electron densities, which was performed using the LOBSTER code<sup>5</sup>. The integrated values of the COHP (ICOHP) are convenient to quantify bond order and compare bond strength.”

- 1
- 2
- 3
- 4
- 5
- 6
- 7
- 8
- 9
- 10
- 11
- 12
- 13
- 14
- 15
- 16
- 17
- 18
- 19
- 20
- 21
- 22
- 23

**Section 2 Supplementary Figures**

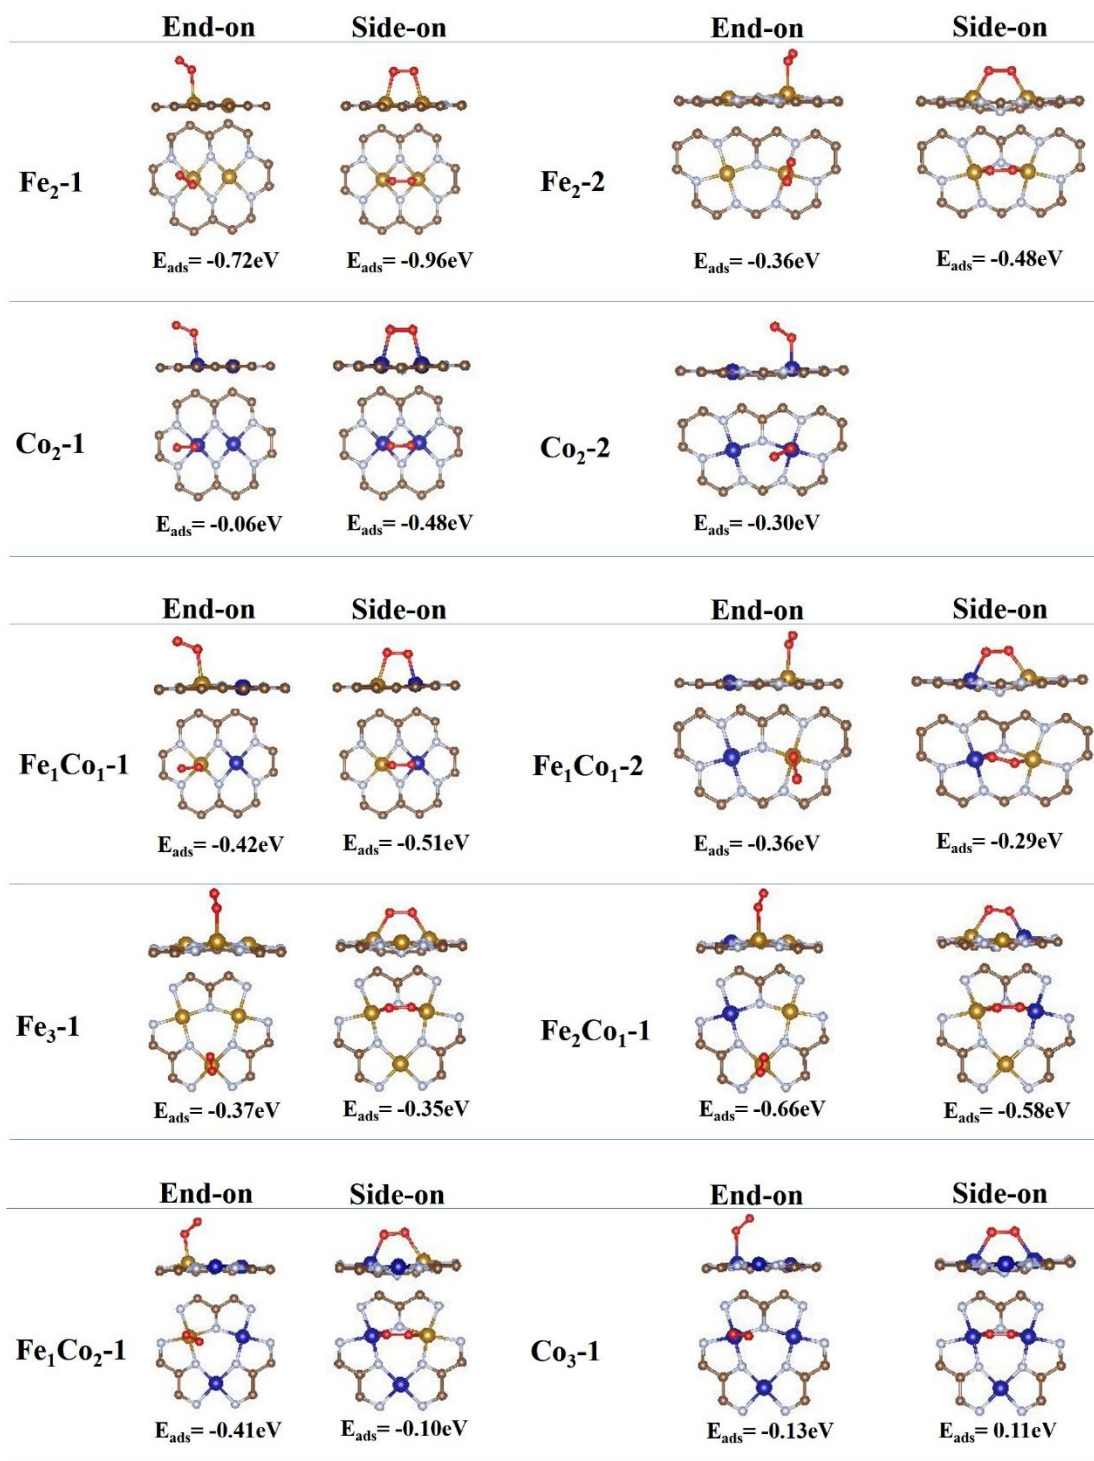

**Figure S1. Adsorption configuration.** The adsorption energy of O<sub>2</sub>\* with end-on, , and side-on configuration 10 Fe<sub>x</sub>Co<sub>2-x</sub>-NC/ Fe<sub>x</sub>Co<sub>3-x</sub>-NC systems.

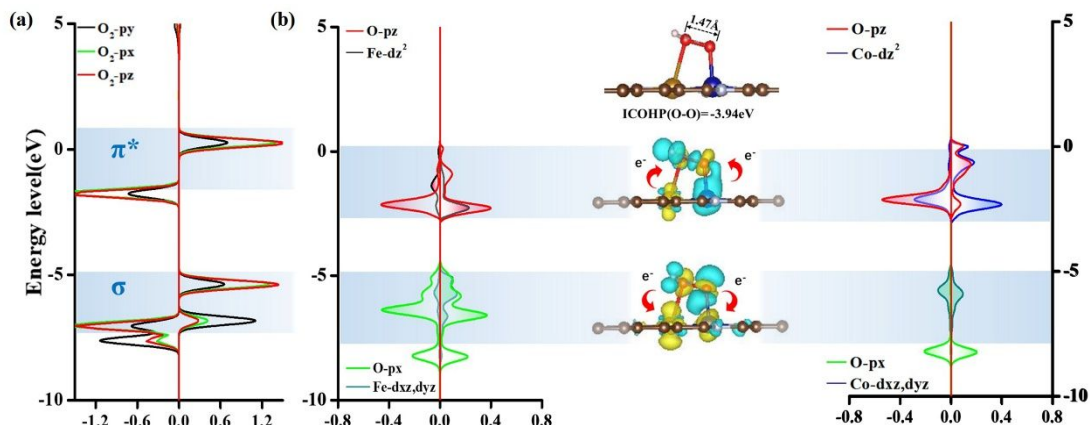

**Figure S2.** (a) Partial density of states (PDOS) for O<sub>2</sub>. (b) Partial differential charge density projecting to specific energy level, projected density of state between OOH and Fe<sub>1</sub>Co<sub>1</sub>-DAC.

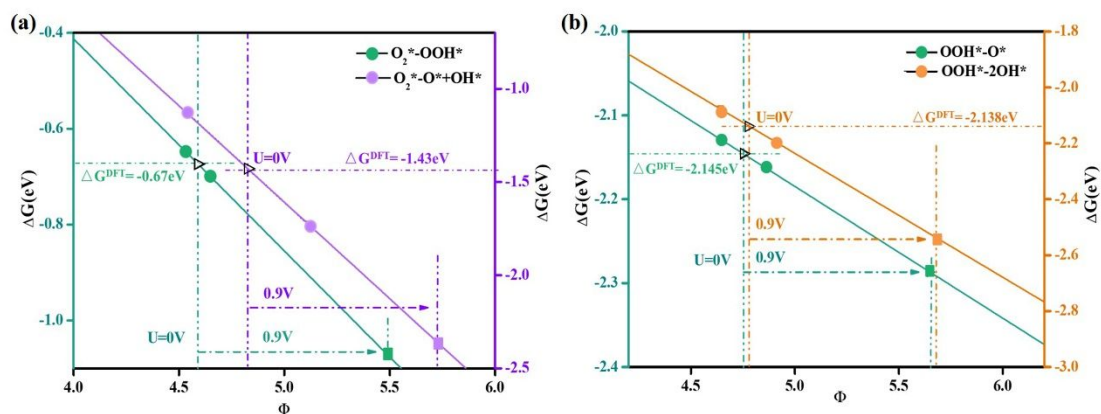

**Figure S3.** Potential-dependence of the reaction free energy ( $\Delta G$ ) for ORR on Fe-Co DAC to form (a)  $\Delta G(\text{O}_2^* - \text{OOH}^*)$  and  $\Delta G(\text{O}_2^* - \text{O}^* + \text{OH}^*)$ , (b)  $\Delta G(\text{OOH}^* - \text{O}^*)$  and  $\Delta G(\text{OOH}^* - 2\text{OH}^*)$  as predicted by DFT-PBE. Triangles represent the intersection points of these horizontal lines with their corresponding  $\Phi$ -dependent reaction free energies within DFT-PBE. The vertical dashed lines indicate  $\Phi$  associated with applied potentials of 0.0 and 0.9 V as labeled. Squares represent data extrapolated to an applied potential of 0.9 V.

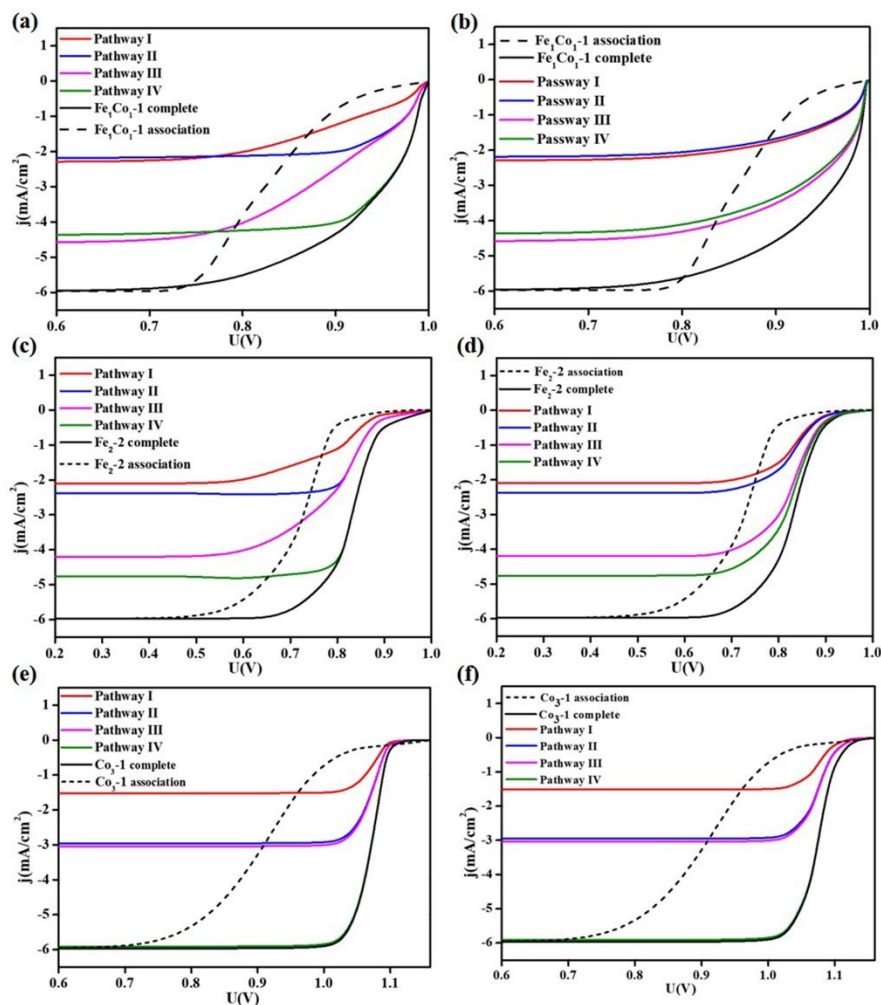

**Figure S4.** The polarization curves of (a)  $\text{Fe}_1\text{Co}_1$ -1 DAC, (c)  $\text{Fe}_2$ -2 and (e)  $\text{Co}_3$ -1 TAC were calculated with an activation energy of 0.26 eV, and polarization curves of (b)  $\text{Fe}_1\text{Co}_1$ -1 DAC, (d)  $\text{Fe}_2$ -2 and (f)  $\text{Co}_3$ -1 TAC were calculated with the corresponding O–O bond breaking activation barriers.

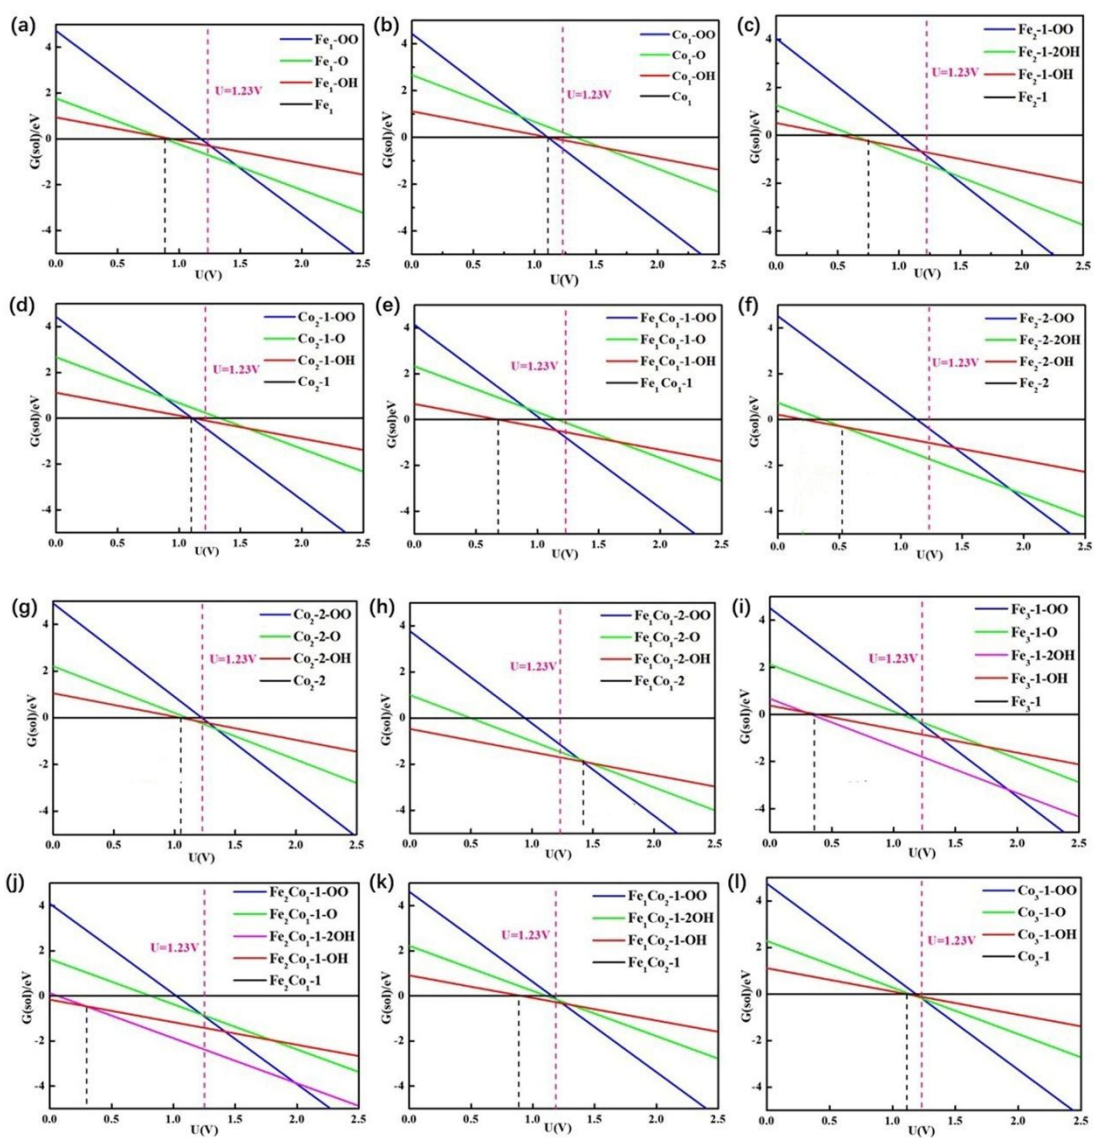

**Figure S5.** Stability of the intermediates of ORR on 10  $\text{Fe}_x\text{Co}_{2-x}\text{NC}/\text{Fe}_x\text{Co}_{3-x}\text{NC}$  systems at pH = 0 at varying electrode potential.

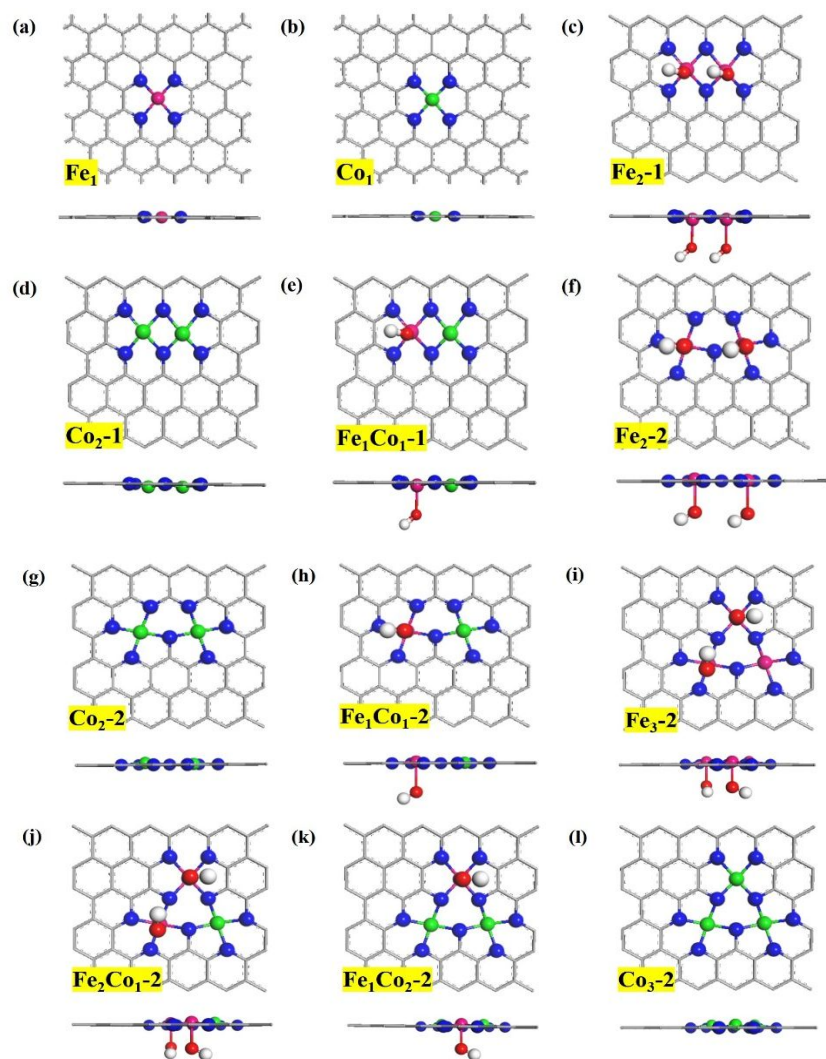

**Figure S6.** The resulting surface pre-adsorption diagram at  $T = 298$  K shows clearly which is the most stable form. Color scheme: C, gray; N, blue; pink, Fe; green, Co; red, O; white, H.

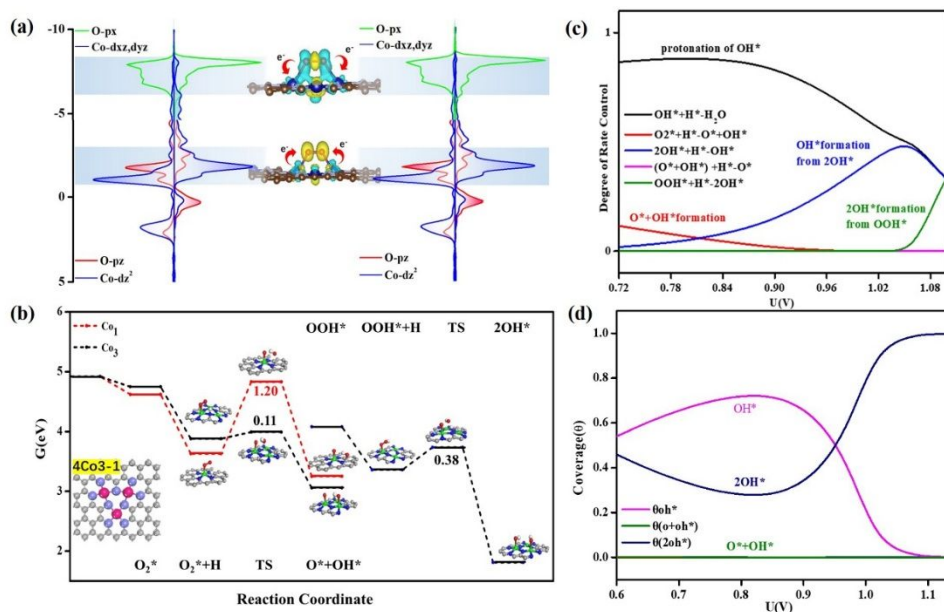

**Figure S7.** (a) Partial differential charge density projecting to specific energy level, projected density of state between O<sub>2</sub> on Co<sub>3</sub>-TAC. (b) The O-O bond cleavage barrier of Co-SAC and Co<sub>3</sub>-TAC. (c) The coverage and (d) degree of rate control for each elementary step intermediate in reaction network as a function of output potential on Co<sub>3</sub>-TAC. Coverage and degree of rate control profiles for only the relevant states are shown in the respective panel for each metal, and those not explicitly shown indicate zero coverage.

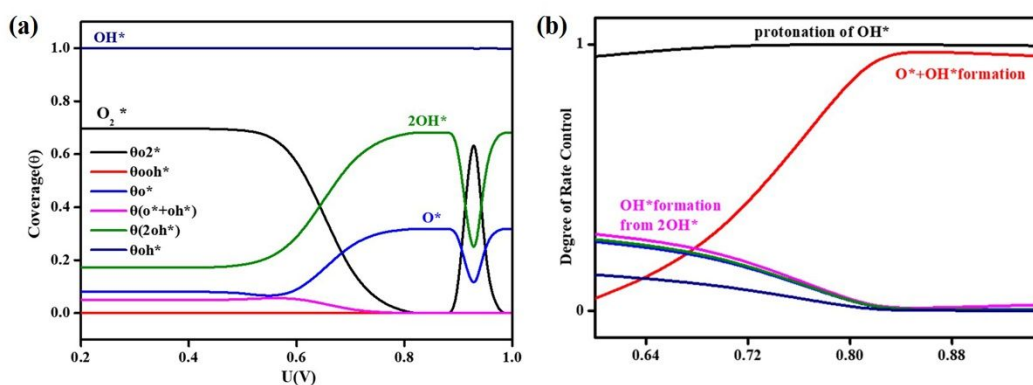

**Figure S8.** (a) The coverage and (b) degree of rate control for each elementary step intermediate in reaction network as a function of output potential on Fe<sub>2</sub>-2 DAC. Coverage and degree of rate control profiles for only the relevant states are shown in the respective panel for each metal, and those not explicitly shown indicate zero coverage. The coverage profiles (except for OH<sup>\*</sup>) is the result of twice uniformization.

1

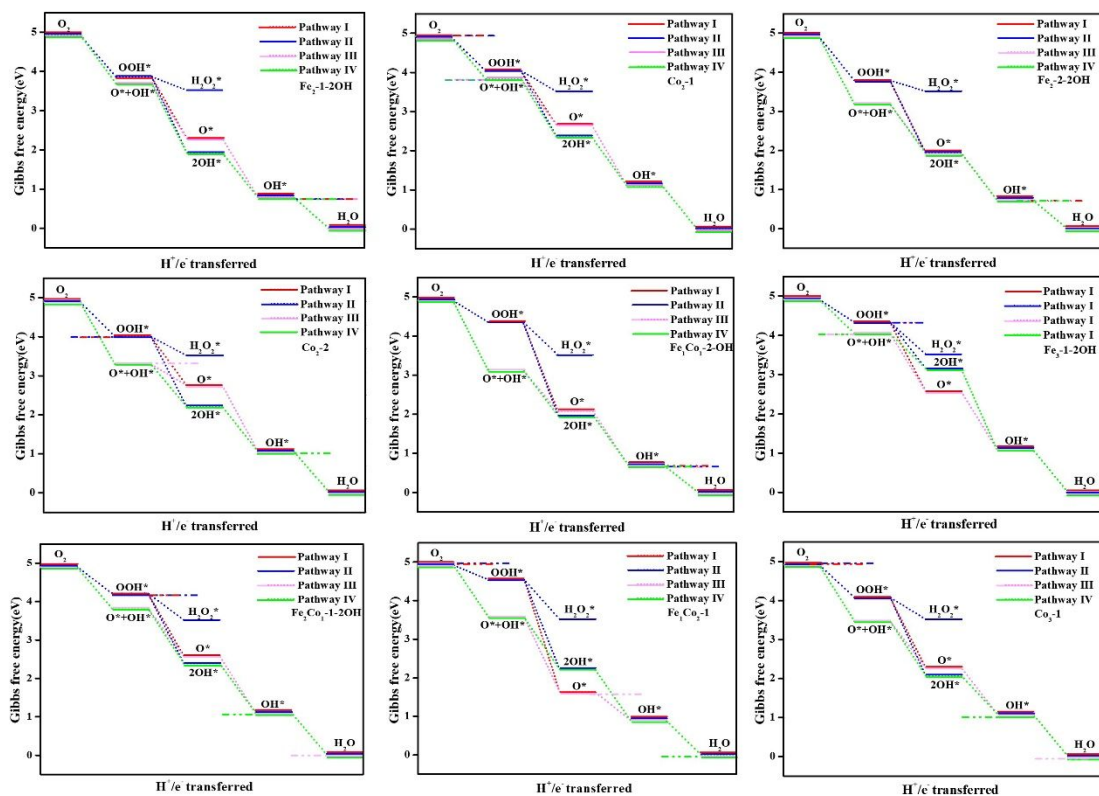

2

3 **Figure S9.** Calculated free energy profiles of complete reaction pathways I-IV for ORR.

4

5

6

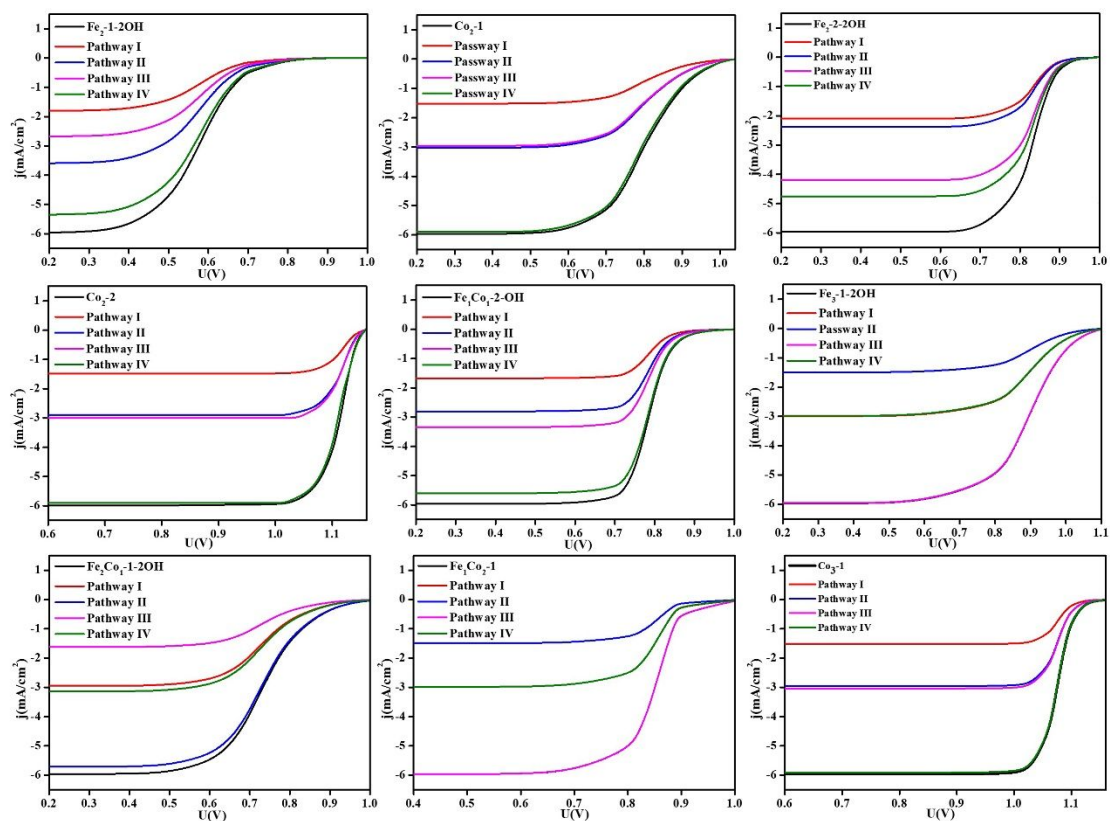

**Figure S10.** Simulated polarization curves of  $\text{Fe}_x\text{Co}_{2-x}\text{-NC}$ /  $\text{Fe}_x\text{Co}_{3-x}\text{-NC}$  systems.

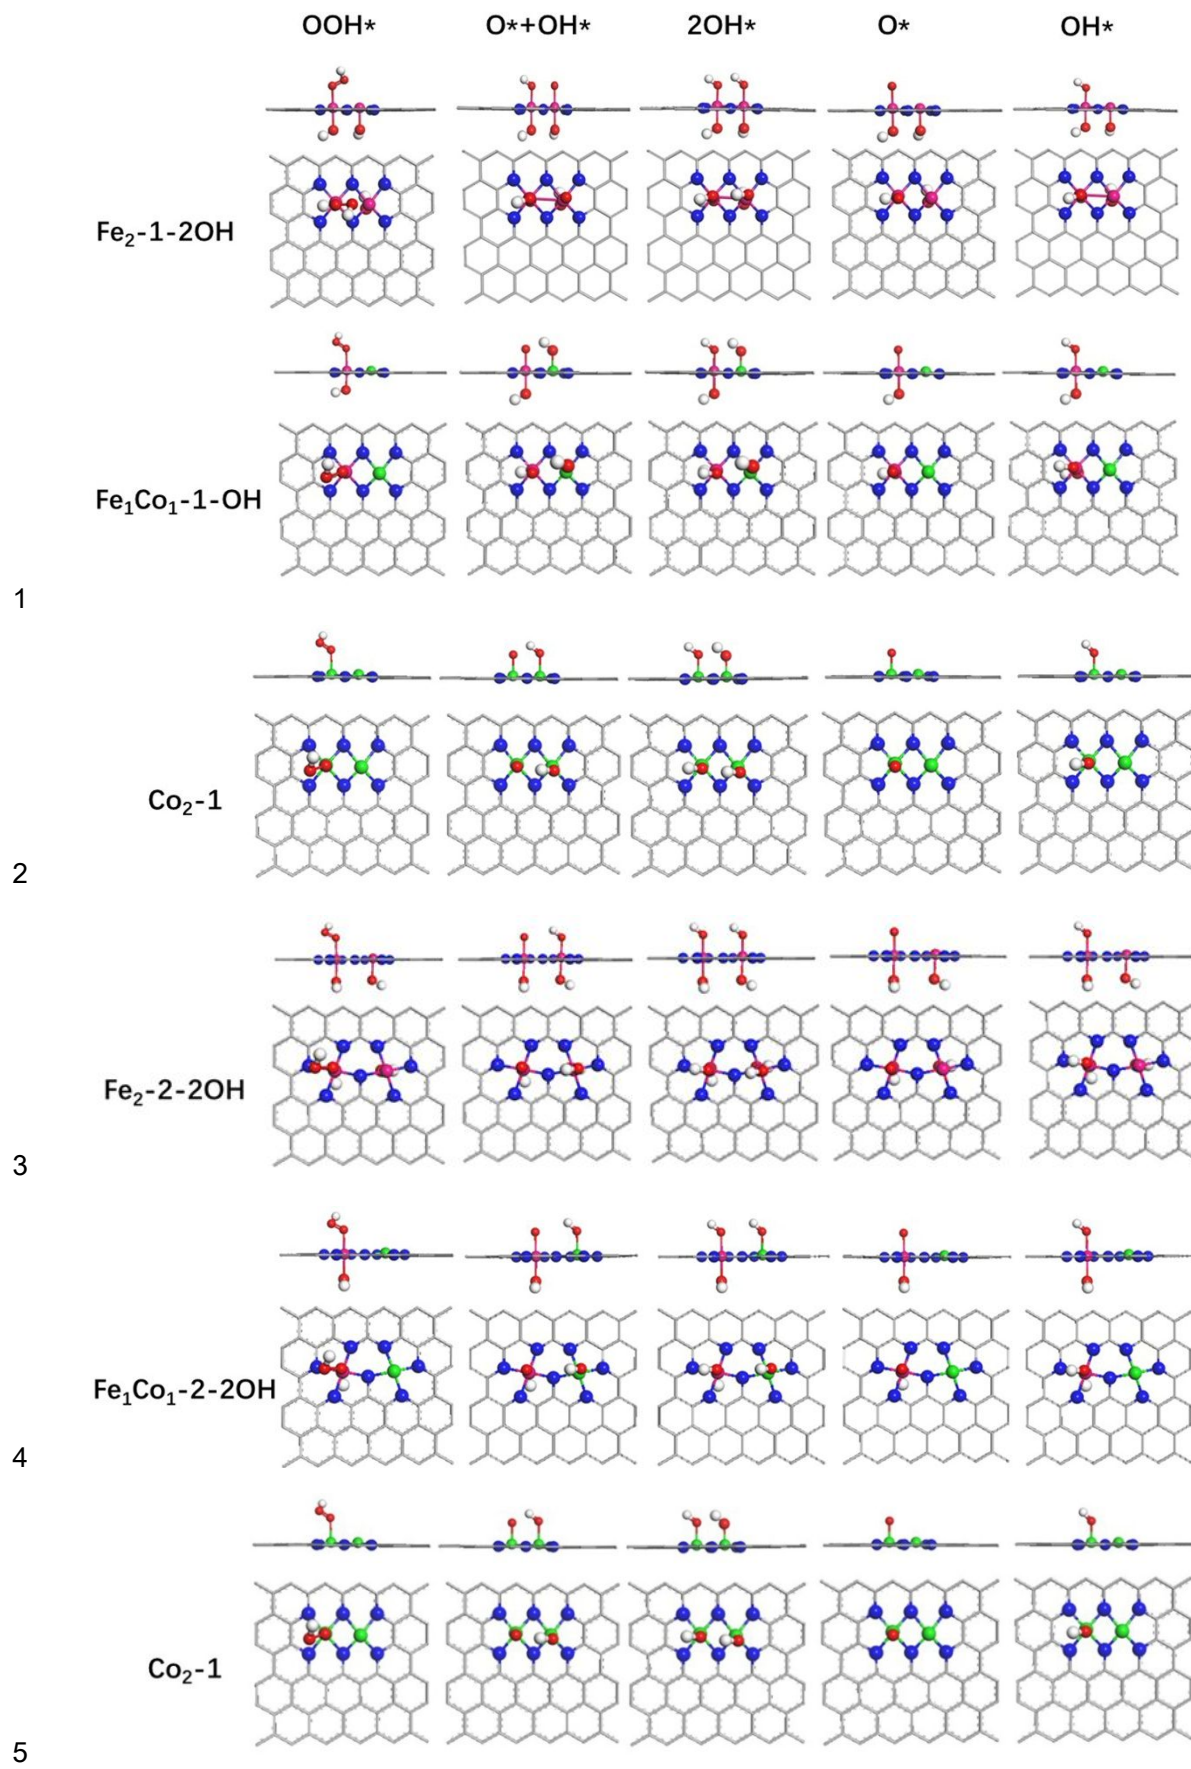

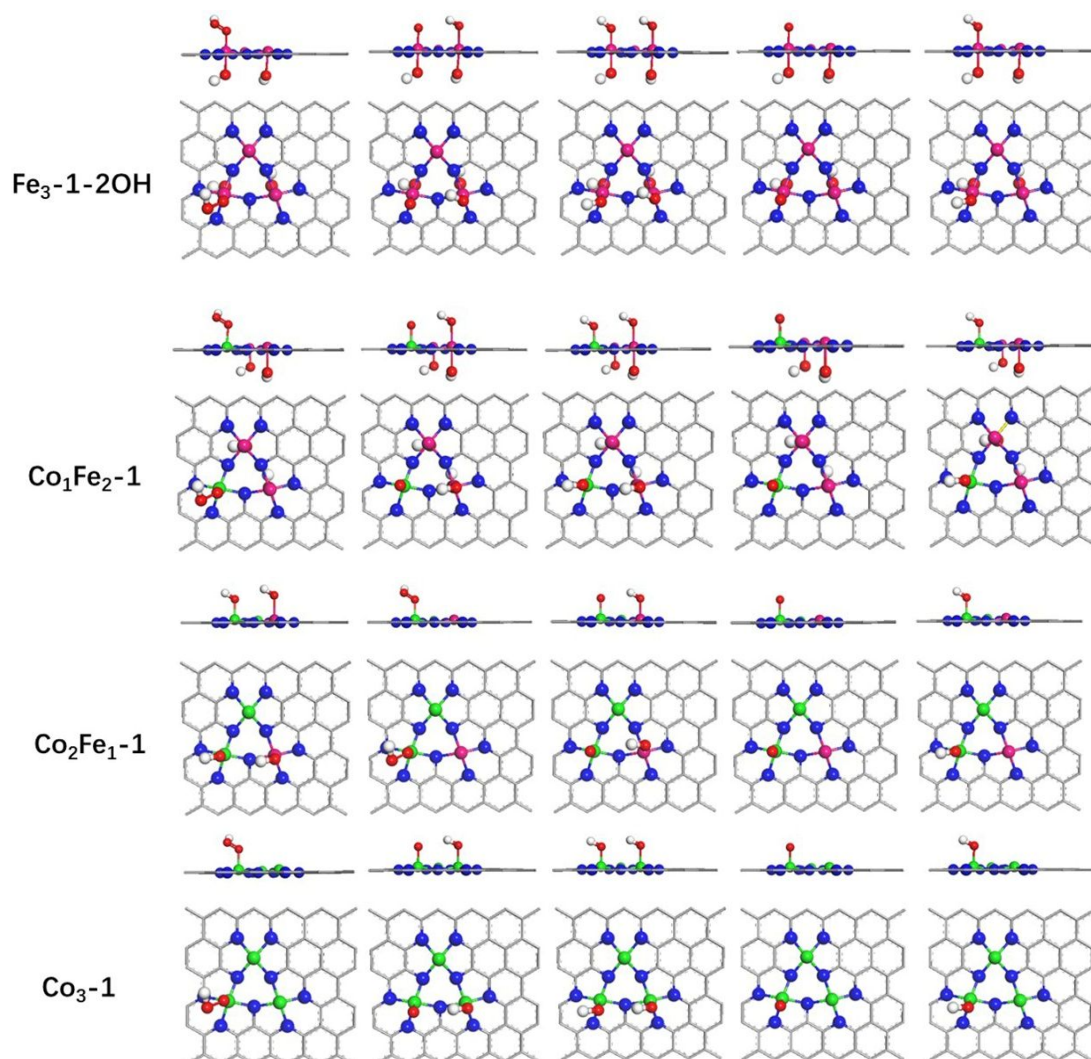

**Figure S11.** Top views of  $\text{OOH}^*$ ,  $\text{O}+\text{OH}^*$ ,  $2\text{OH}^*$ ,  $\text{O}^*$  and  $\text{OH}^*$  adsorption on the ten  $\text{Fe}_x\text{Co}_{2-x}\text{-NC}/\text{Fe}_x\text{Co}_{3-x}\text{-NC}$  systems. Color scheme: C, gray; N, blue; pink, Fe; green, Co; red, O; white, H.

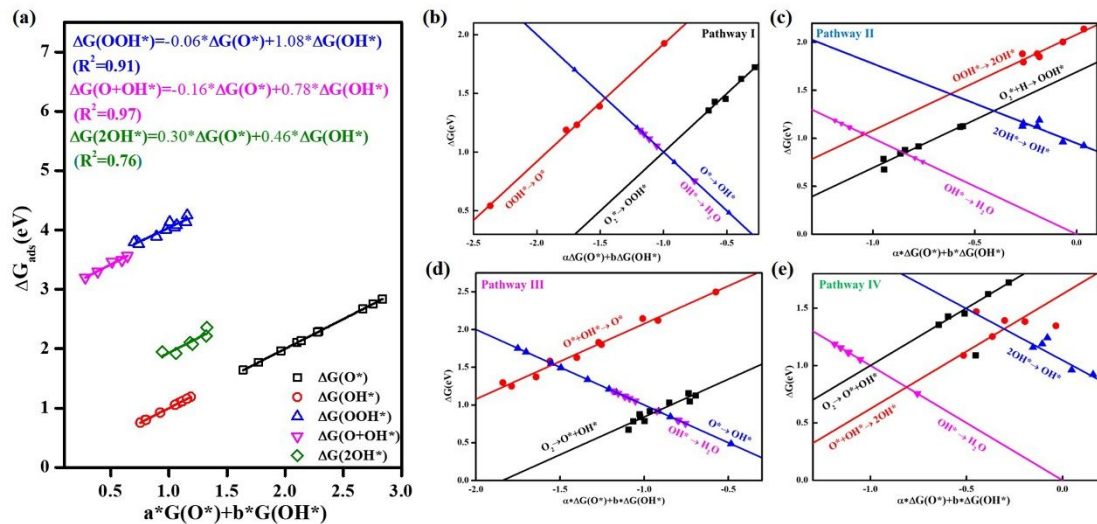

**Figure S12.** (a) Scaling relations between the free energies of OH\*, O\*, 2OH\*, O\*+OH\*, and OOH\* on Fe-Co DACs/TACs. (b-e) Scaling relations between free energies changes of each elementary step along the four reaction pathways and  $a^* \Delta G(\text{O}^*) + b^* \Delta G(\text{OH}^*)$ . Fit variance of the solid lines and a/b in  $a^* \Delta G(\text{O}^*) + b^* \Delta G(\text{OH}^*)$  are shown in Tables S7.

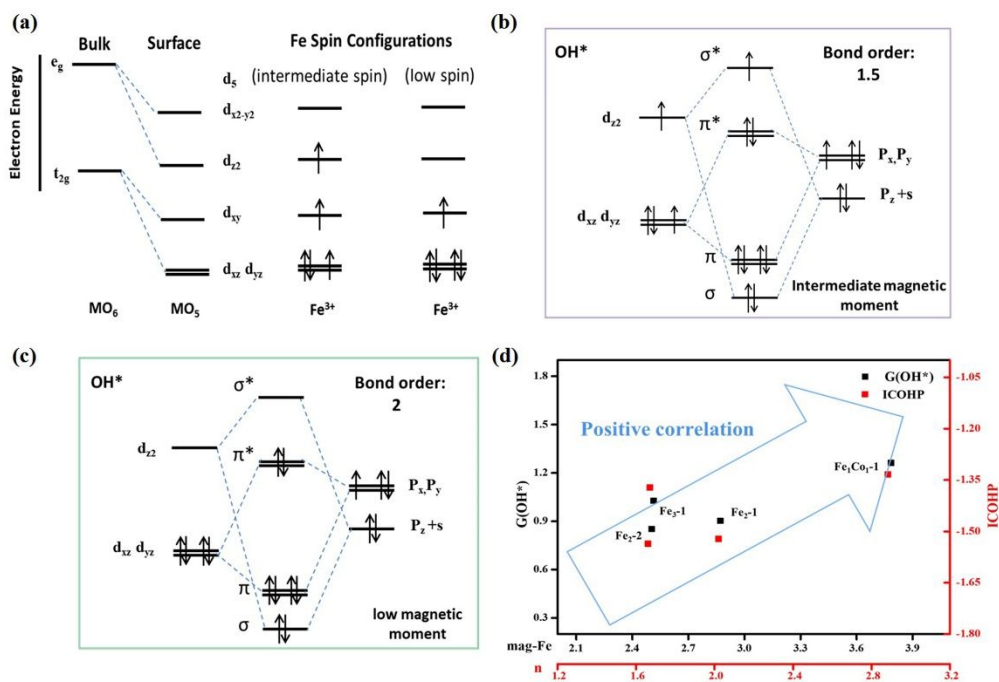

**Figure S13.** (a) The d-electron configurations of iron cations with intermediate and low spin polarization. (b) The orbital interactions between Fe cations with intermediate magnetic moment and OH\* intermediate. (c) The orbital interactions between Fe cations with low magnetic moment and OH\* intermediate. (d) Linear relationship between  $\Delta G(\text{OH}^*)$  and on-site magnetic moments of the Fe center on DACs/TACs (namely, mag-Fe).

1

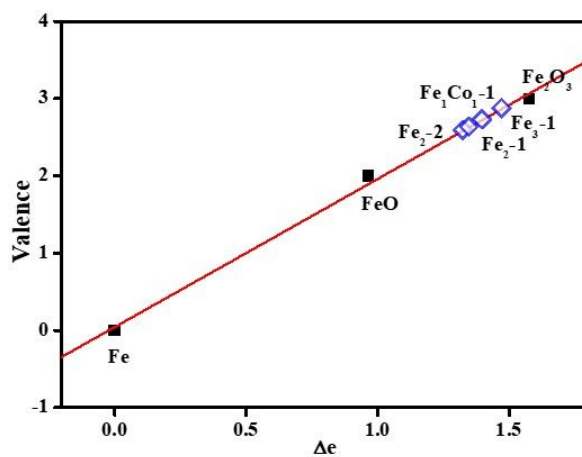

2

3 **Figure S14.** Bader charge analysis reveal Fe site transferred charge (namely,  $\Delta e$ ) in  $\text{Fe}_1\text{Co}_1-1$ ,  $\text{Fe}_2-$   
 4  $1$ ,  $\text{Fe}_2-2$  and  $\text{Fe}_3-1$  and linear fitting were carried out to obtain the valence state of Fe atoms in the  
 5 corresponding system.

6

7

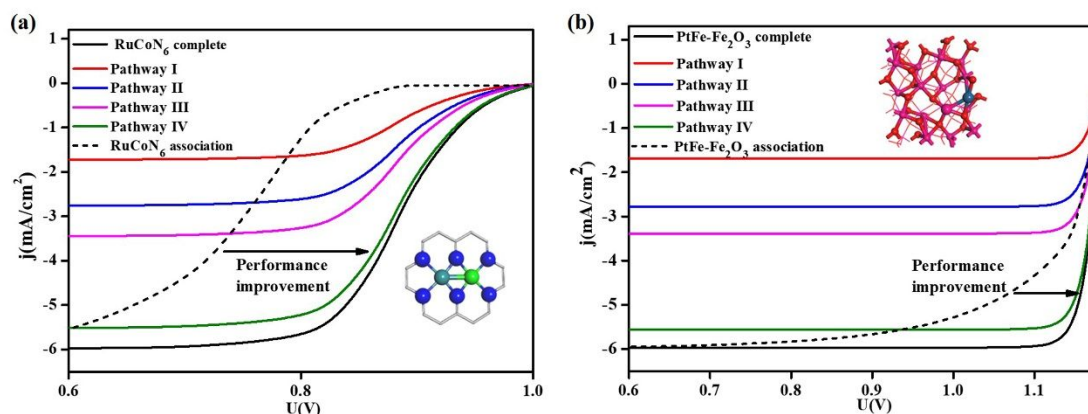

8

9 **Figure S15.** Simulated polarization curves of ORR on  $\text{RuCo@graphene}$  and  $\text{PtFe@Fe}_2\text{O}_3(012)$ .

10

11

12

13

14

15

## Section 3 Supplementary Tables

**Table S1.** The dissociation barriers of O-O for different elementary reaction on Fe<sub>1</sub>Co<sub>1</sub>-1 DAC, Fe<sub>2</sub>-2 DAC and Co<sub>3</sub>-1 TAC with consideration of OH\* preadsorption .

|                      | Fe <sub>1</sub> Co <sub>1</sub> -1 DAC | Fe <sub>2</sub> -2 DAC | Co <sub>3</sub> -1 TAC |
|----------------------|----------------------------------------|------------------------|------------------------|
| O <sub>2</sub> *+H*→ | 0.56eV                                 | 0.83eV                 | 0.11eV                 |
| O*+OH*               |                                        |                        |                        |
| OOH*+H*→             | 0.25eV                                 | 0.28eV                 | 0.38eV                 |
| 2OH*                 |                                        |                        |                        |

**Table S2.** Half-wave potentials ( $E_{1/2}$ ) and  $E_{\text{onset}}$  for ORR of Fe/Co SAC and Fe-Co DAC obtained from various simulations and experiments.

| $E_{1/2}$ (V vs RHE) | Fe SAC | Co SAC | FeCo DAC | References   |
|----------------------|--------|--------|----------|--------------|
| Simulations          | 0.8    | 0.69   | 0.96     | --           |
| Experiments          | 0.75   | 0.75   | 0.86     | <sup>6</sup> |

  

| $E_{\text{onset}}$ ( eV ) | Pathway     | Fe SAC | Co SAC | FeCo DAC | References   |
|---------------------------|-------------|--------|--------|----------|--------------|
| Simulations               | I           | 0.84   | 0.79   | 0.67     | --           |
|                           | II          | --     | --     | 0.67     |              |
|                           | III         | --     | --     | 0.91     |              |
|                           | VI          | --     | --     | 0.92     |              |
| Experiments               | association | 0.9    | 0.88   | 1.02     | <sup>7</sup> |

**Table S3.** Computed anti-aggregation energy ( $E_{\text{anti-agg}}$ ) and dissolution potential ( $U_{\text{diss}}$ ) are also listed.

| Systems            | $E_{\text{anti-agg}}$ (eV) | $U_{\text{diss}}$ (V) |
|--------------------|----------------------------|-----------------------|
| Fe <sub>2</sub> -1 | -1.45                      | 0.28                  |
| FeCo-1             | -6.99                      | 3.05                  |
| Co <sub>2</sub> -1 | -2.48                      | 0.96                  |
| Fe <sub>2</sub> -2 | -2.75                      | 0.28                  |
| FeCo-2             | -2.52                      | 0.98                  |
| Co <sub>2</sub> -2 | -1.82                      | 0.63                  |
| Fe <sub>2</sub> -3 | 0.73                       | -0.81                 |
| FeCo-3             | 0.18                       | -0.54                 |
| Co <sub>2</sub> -3 | -0.82                      | -0.03                 |
| Fe <sub>2</sub> -4 | 0.57                       | -0.73                 |

|                                    |       |       |
|------------------------------------|-------|-------|
| FeCo-4                             | 0.76  | -0.83 |
| Co <sub>2</sub> -4                 | -0.21 | -0.18 |
| Fe <sub>2</sub> -5                 | 1.13  | -1.01 |
| FeCo-5                             | 0.26  | -0.58 |
| Co <sub>2</sub> -5                 | 0.09  | -0.32 |
| Co <sub>3</sub> -1                 | -3.42 | 1.43  |
| Co <sub>2</sub> Fe <sub>1</sub> -1 | -3.36 | 1.40  |
| Co <sub>1</sub> Fe <sub>2</sub> -1 | -2.26 | 0.68  |
| Fe <sub>3</sub> -1                 | -2.62 | 0.86  |
| Co <sub>3</sub> -2                 | 0.56  | -0.56 |
| Co <sub>2</sub> Fe <sub>1</sub> -2 | 1.14  | -0.85 |
| Co <sub>1</sub> Fe <sub>2</sub> -2 | 1.22  | -1.06 |
| Fe <sub>3</sub> -2                 | 1.51  | -1.20 |
| Co <sub>3</sub> -3                 | -0.33 | -0.11 |
| Co <sub>2</sub> Fe <sub>1</sub> -3 | -0.25 | -0.15 |
| Co <sub>1</sub> Fe <sub>2</sub> -3 | 0.53  | -0.71 |
| Fe <sub>3</sub> -3                 | 0.26  | -0.57 |
| Co <sub>3</sub> -4                 | 5.19  | -2.88 |
| Co <sub>2</sub> Fe <sub>1</sub> -4 | 0.57  | -0.56 |
| Co <sub>1</sub> Fe <sub>2</sub> -4 | 2.17  | -1.53 |
| Fe <sub>3</sub> -4                 | 7.23  | -4.06 |
| Co <sub>3</sub> -5                 | 1.37  | -0.96 |
| Co <sub>2</sub> Fe <sub>1</sub> -5 | 0.59  | -0.58 |
| Co <sub>1</sub> Fe <sub>2</sub> -5 | 1.09  | -0.99 |
| Fe <sub>3</sub> -5                 | 2.21  | -1.56 |

**Table S4.** Onset potentials ( $E_{\text{onset}}$ ) for ORR of Fe-Co DAC/TAC when considering the complete pathways and single-site association pathway only, respectively.

| Systems                                | complete pathways | conventional pathway |
|----------------------------------------|-------------------|----------------------|
| Fe <sub>2</sub> -1-2OH                 | 0.79eV            | 0.79eV               |
| Co <sub>2</sub> -1                     | 0.88eV            | 1.09eV               |
| Fe <sub>1</sub> Co <sub>1</sub> -1-OH  | 0.67eV            | 0.92eV               |
| Fe <sub>2</sub> -2-2OH                 | 0.75eV            | 0.75eV               |
| Co <sub>2</sub> -2                     | 0.92eV            | 1.05eV               |
| Fe <sub>1</sub> Co <sub>1</sub> -2-OH  | 0.55eV            | 0.80eV               |
| Fe <sub>3</sub> -1-2OH                 | 0.58eV            | 0.87eV               |
| Fe <sub>2</sub> Co <sub>1</sub> -1-2OH | 0.71eV            | 1.09eV               |
| Fe <sub>1</sub> Co <sub>2</sub> -1     | 0.66eV            | 1.03eV               |
| Co <sub>3</sub> -1                     | 0.84eV            | 1.11eV               |

**Table S5.** Half-wave potentials ( $E_{1/2}$ ) for ORR of Fe-Co DAC/TAC when considering the complete pathways and single-site association pathway only, respectively.

| Systems                                | complete pathways | conventional pathway |
|----------------------------------------|-------------------|----------------------|
| Fe <sub>2</sub> -1-2OH                 | 0.6V              | 0.49V                |
| Co <sub>2</sub> -1                     | 0.82V             | 1.07V                |
| Fe <sub>1</sub> Co <sub>1</sub> -1-OH  | 0.93V             | 0.81V                |
| Fe <sub>2</sub> -2-2OH                 | 0.83V             | 0.72V                |
| Co <sub>2</sub> -2                     | 1.11V             | 1.04V                |
| Fe <sub>1</sub> Co <sub>1</sub> -2-OH  | 0.80V             | 0.23V                |
| Fe <sub>3</sub> -1-2OH                 | 0.91V             | 0.61V                |
| Fe <sub>2</sub> Co <sub>1</sub> -1-2OH | 0.76V             | 0.73V                |
| Fe <sub>1</sub> Co <sub>2</sub> -1     | 0.86V             | 0.42V                |
| Co <sub>3</sub> -1                     | 1.06V             | 0.85V                |

3

**Table S6.** Adsorption free energy ( $\Delta G$  in eV) for the ORR intermediates on 10 FexCo<sub>2-x</sub>-NC/ FexCo<sub>3-x</sub>-NC systems in this study.

|                                    | OOH* | O*+OH* | O*   | 2OH* | OH*  |
|------------------------------------|------|--------|------|------|------|
| Fe <sub>2</sub> -1                 | 3.87 | 3.80   | 2.29 | 1.92 | 0.79 |
| Fe <sub>1</sub> Co <sub>1</sub> -1 | 4.25 | 3.73   | 2.1  | 2.11 | 1.19 |
| Co <sub>2</sub> -1                 | 4.04 | 3.83   | 2.67 | 2.36 | 1.12 |
| Fe <sub>2</sub> -2                 | 3.79 | 3.2    | 1.96 | 1.94 | 0.76 |
| Fe <sub>1</sub> Co <sub>1</sub> -2 | 4.37 | 3.14   | 2.07 | 1.97 | 0.71 |
| Co <sub>2</sub> -2                 | 4.00 | 3.3    | 2.75 | 2.21 | 1.05 |
| Fe <sub>3</sub> -1                 | 4.33 | 4.05   | 2.57 | 3.16 | 1.11 |
| Fe <sub>2</sub> Co <sub>1</sub> -1 | 4.21 | 3.82   | 2.58 | 2.39 | 1.10 |
| Fe <sub>1</sub> Co <sub>2</sub> -1 | 4.54 | 3.56   | 1.64 | 2.22 | 0.91 |
| Co <sub>3</sub> -1                 | 4.08 | 3.47   | 2.28 | 2.07 | 1.11 |

6

**Table S7.** Fit variance of the solid lines and a/b in  $a*\Delta G(O^*) + b*\Delta G(OH^*)$  in this study.

| Pathway I            | a            | b        |
|----------------------|--------------|----------|
| O <sub>2</sub> -OOH* | 0.00293      | -0.92588 |
| OOH*-O*              | -1.00293     | 0.925881 |
| O*-OH*               | 1            | -1       |
| OH*-H <sub>2</sub> O | 3.75558E-6   | 1        |
| Pathway II           | a            | b        |
| O <sub>2</sub> -OOH* | 0.07025      | -0.92076 |
| OOH*-2OH*            | -0.32853     | 0.61174  |
| 2OH*-OH*             | -0.32853     | 0.61174  |
| OH*-H <sub>2</sub> O | -3.63638E-18 | 1        |

| Pathway III      | a            | b        |
|------------------|--------------|----------|
| $O_2-O^*+OH^*$   | 0.15876      | -0.78324 |
| $O^*+OH^*-O^*$   | -1.15876     | 0.78324  |
| $O^*-OH^*$       | 1            | -1       |
| $OH^*-H_2O$      | -1.05147E-18 | 1        |
| Pathway IV       | a            | b        |
| $O_2-O^*+OH^*$   | 0.15876      | -0.78324 |
| $O^*+OH^*-2OH^*$ | -0.38395     | 0.5153   |
| $2OH^*-OH^*$     | 0.22733      | -0.73456 |
| $OH^*-H_2O$      | -7.2831E-18  | 1        |

1

## 2 References

- 3 (1) Hansen, H. A.; Viswanathan, V.; Nørskov, J. K., Unifying Kinetic and  
4 Thermodynamic Analysis of 2 e<sup>-</sup> and 4 e<sup>-</sup> Reduction of Oxygen on Metal Surfaces.  
5 *The Journal of Physical Chemistry C* **2014**, *118* (13), 6706-6718.
- 6 (2) Hansen, H. A.; Varley, J. B.; Peterson, A. A.; Nørskov, J. K., Understanding  
7 Trends in the Electrocatalytic Activity of Metals and Enzymes for CO<sub>2</sub> Reduction to  
8 CO. *J Phys Chem Lett* **2013**, *4* (3), 388-92.
- 9 (3) Tripković, V.; Skúlason, E.; Siahrostami, S.; Nørskov, J. K.; Rossmeisl, J.,  
10 The oxygen reduction reaction mechanism on Pt(111) from density functional theory  
11 calculations. *Electrochimica Acta* **2010**, *55* (27), 7975-7981.
- 12 (4) Jinnouchi, R.; Kodama, K.; Hatanaka, T.; Morimoto, Y., First principles based  
13 mean field model for oxygen reduction reaction. *Phys Chem Chem Phys* **2011**, *13* (47),  
14 21070-83.
- 15 (5) Maintz, S.; Deringer, V. L.; Tchougreff, A. L.; Dronskowski, R., LOBSTER:  
16 A tool to extract chemical bonding from plane-wave based DFT. *J Comput Chem* **2016**,  
17 *37* (11), 1030-5.
- 18 (6) Wang, J.; Huang, Z.; Liu, W.; Chang, C.; Tang, H.; Li, Z.; Chen, W.;  
19 Jia, C.; Yao, T.; Wei, S.; Wu, Y.; Li, Y., Design of N-Coordinated Dual-Metal  
20 Sites: A Stable and Active Pt-Free Catalyst for Acidic Oxygen Reduction Reaction. *J*  
21 *Am Chem Soc* **2017**, *139* (48), 17281-17284.
- 22 (7) Xiao, M.; Chen, Y.; Zhu, J.; Zhang, H.; Zhao, X.; Gao, L.; Wang, X.;  
23 Zhao, J.; Ge, J.; Jiang, Z.; Chen, S.; Liu, C.; Xing, W., Climbing the Apex of  
24 the ORR Volcano Plot via Binuclear Site Construction: Electronic and Geometric  
25 Engineering. *J Am Chem Soc* **2019**, *141* (44), 17763-17770.

26
